# Supplementary material for: CDKN2A copy number alteration in bladder cancer: Integrative analysis in patient-derived xenografts and cancer patients
Source: PubMed Central journal article supplement — Mol Ther Oncol. 2024 May 24;32(2):200818. doi: 10.1016/j.omton.2024.200818 (PMC11223115; doi:10.1016/j.omton.2024.200818), 2024-05-24
Supplement: mmc1.pdf [file mmc1.pdf]

**Supplemental information**

***CDKN2A* copy number alteration in bladder  
cancer: Integrative analysis in patient-derived  
xenografts and cancer patients**

**Maria-Alexandra Papadimitriou, Katerina-Marina Pilala, Konstantina Panoutsopoulou, Panagiotis Levis, Georgios Kotronopoulos, Zoi Kanaki, Gedeon Loules, Maria Zamanakou, Dimitrios Linardoutsos, Diamantis C. Sideris, Konstantinos Stravodimos, Apostolos Klinakis, Andreas Scorilas, and Margaritis Avgeris**

**Figure S1**

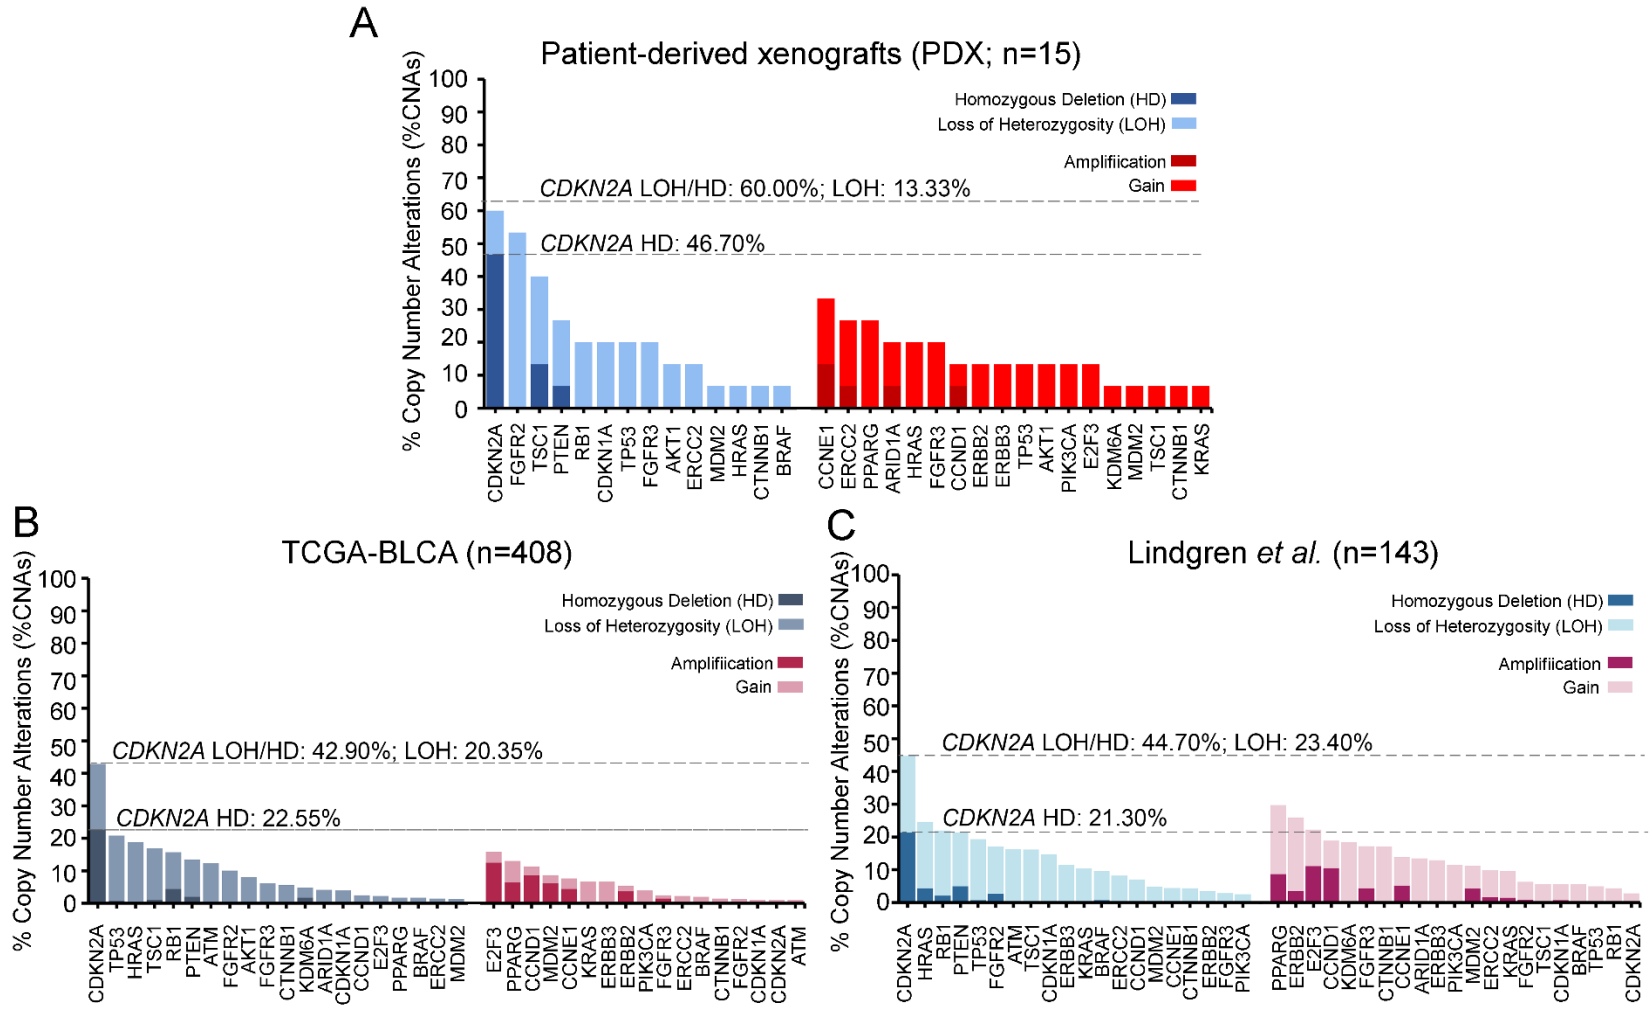

**Figure S1.** Bar graphs of gene level CNAs frequency (%) in PDX tumors samples (A), TCGA-BLCA dataset (B) and Lindgren *et al.* dataset (C).

**Figure S2**

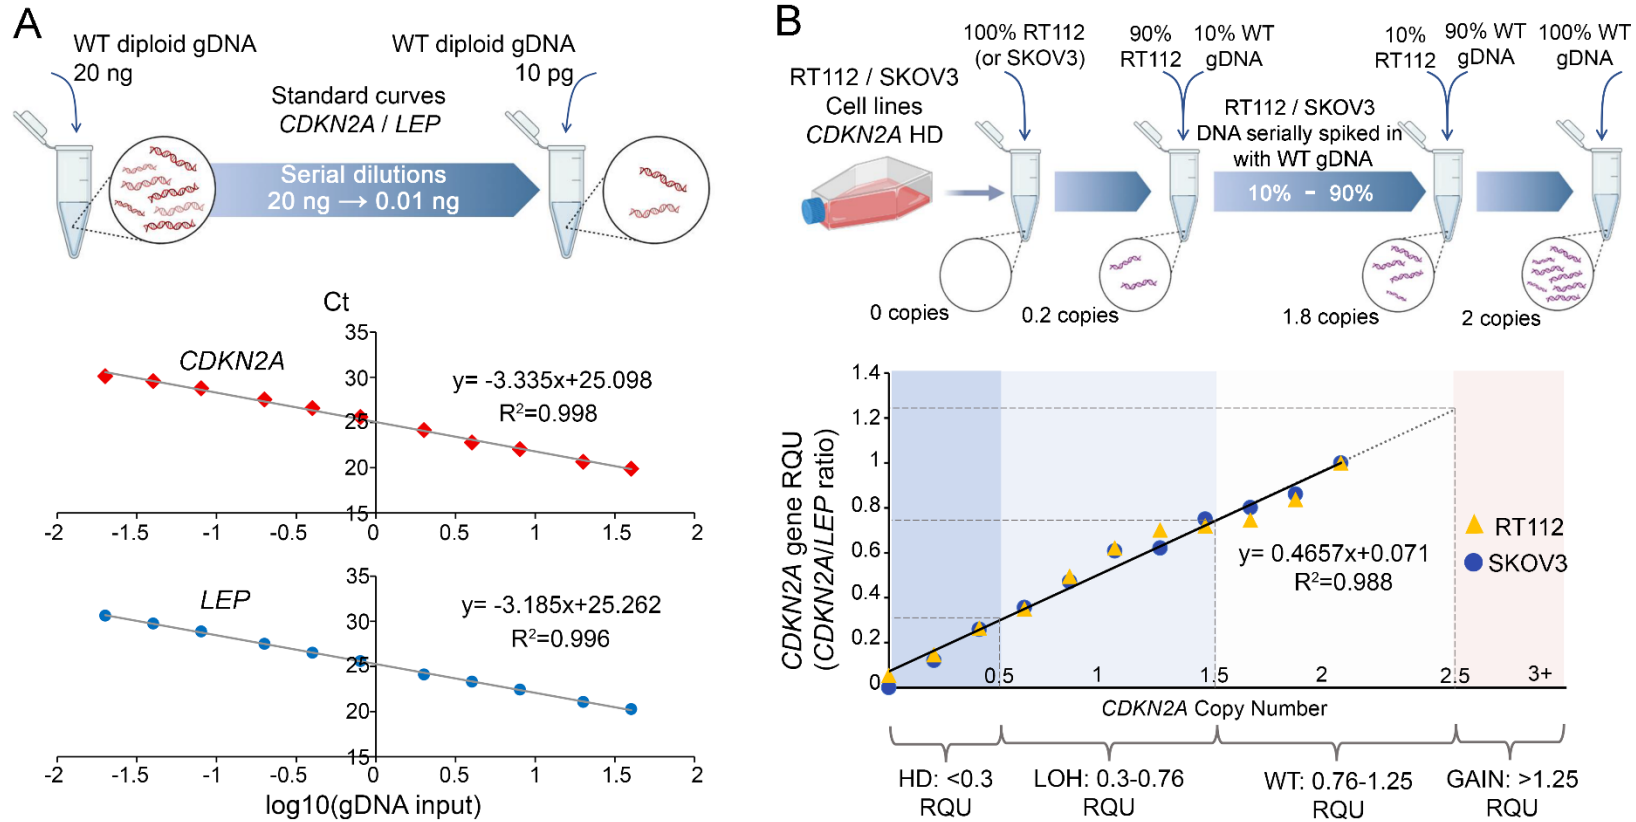

**Figure S2. Development and validation of *in-house* qPCR-based method for *CDKN2A* copy-number status analysis.** A. Standard curves of *CDKN2A* and *LEP* qPCR assays (range of gDNA: 0.01-20 ng). Both assays demonstrated high linearity, ensuring that PCR amplification efficiency (*CDKN2A*: E=99.9%; *LEP*: E=103.1%), of each target is constant over a broad concentration range. B. Standard curve for defining the optimal cut-offs for *CDKN2A* copy-number status. RT112 and SK-OV-3 cell lines, with known HD of *CDKN2A* (NCI-60/UBC-40 cell line panels) were spiked in with serially increasing amounts of *CDKN2A* diploid (wt) gDNA (0-100%). *CDKN2A* HD: *CDKN2A*/*LEP* ratio  $\leq 0.30$ , LOH: *CDKN2A*/*LEP* ratio=0.30-0.76, diploid (wt): *CDKN2A*/*LEP* ratio =0.76-1.25, gain: *CDKN2A*/*LEP* ratio  $\geq 1.25$  RQU. gDNA: genomic DNA, HD: Homozygous deletion, LOH: Loss-of-heterozygosity, WT: Wild type, RQU: Relative quantitation units.

**Figure S3**

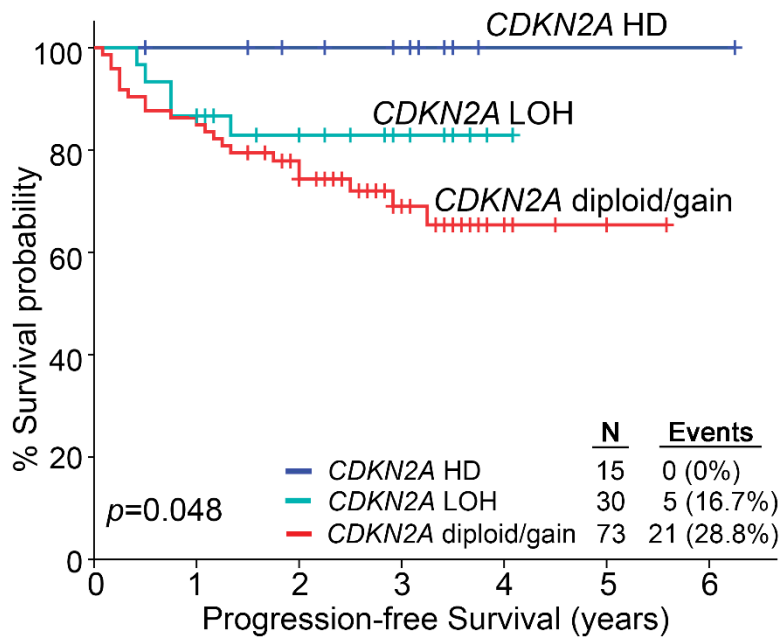

**Figure S3.** Kaplan-Meier survival curves for progression-free survival (PFS) of NMIBC patients according to HD vs. LOH vs. diploid/gain *CDKN2A* copy-number status. *p*-values calculated by log-rank test. HD: Homozygous deletion, LOH: Loss-of-heterozygosity

**Figure S4**

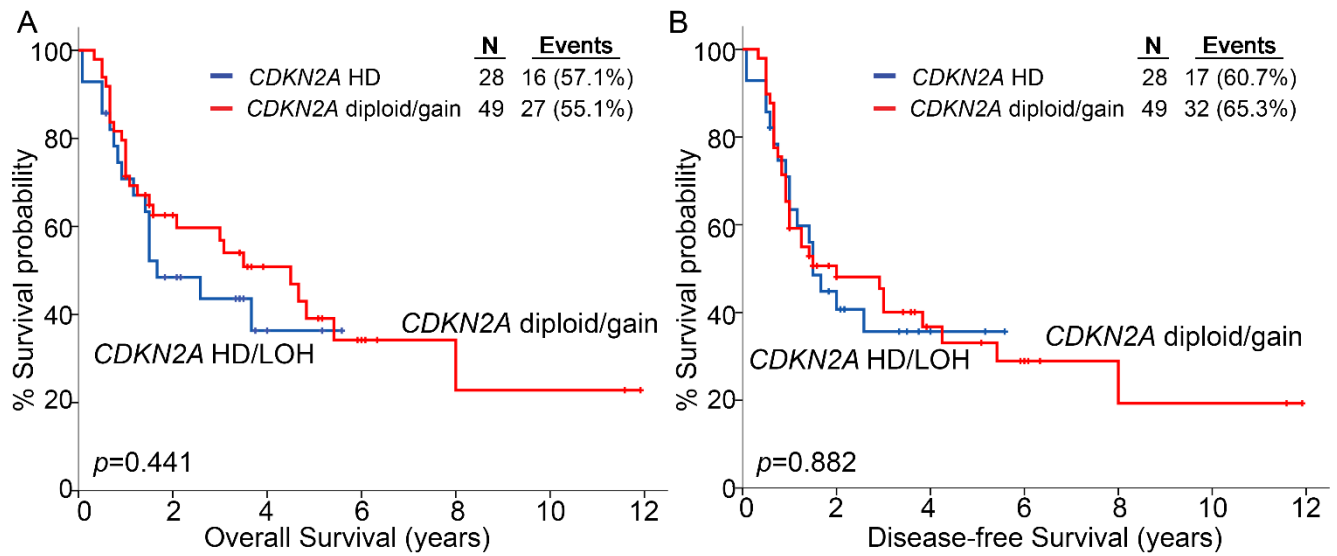

**Figure S4.** Kaplan-Meier survival curves for overall survival (OS) and Disease-free survival (DFS) of MIBC patients.  $p$ -values calculated by log-rank test. HD: Homozygous deletion; LOH: Loss-of-heterozygosity.

Figure S5

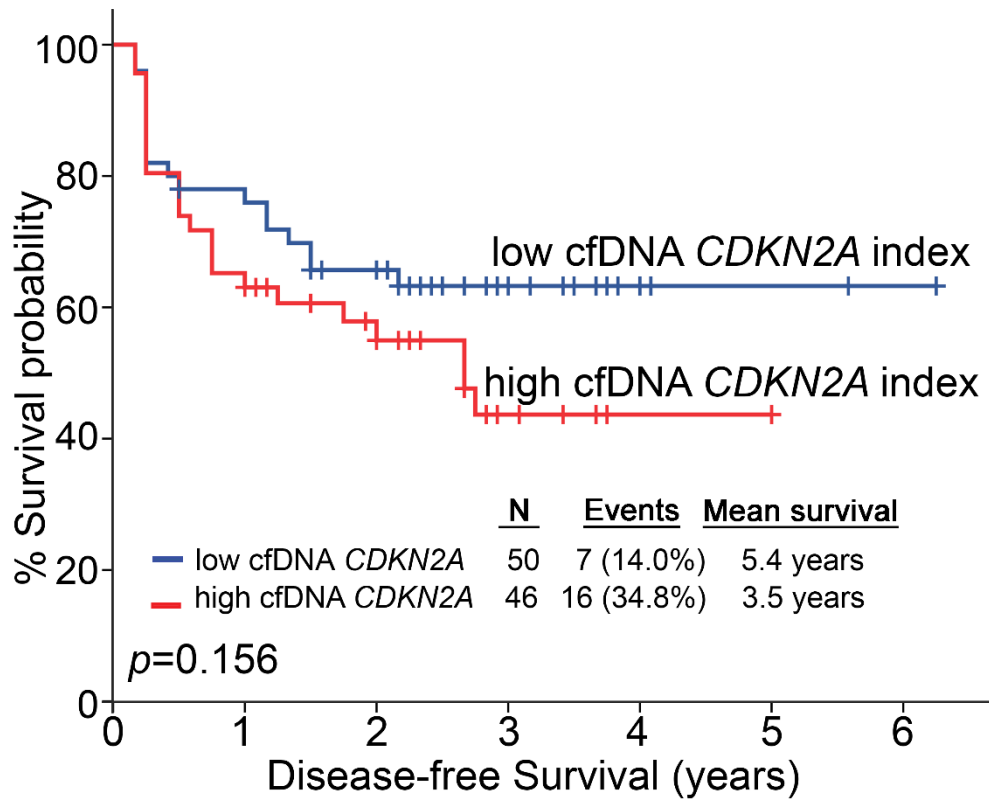

**Figure S5.** Kaplan-Meier survival curve for the disease-free survival (DFS) of NMIBC patients according to cfDNA *CDKN2A* index. *p*-values calculated by log-rank test. cfDNA: cell-free DNA.

**Table S1. Cox regression analysis for the prediction of NMIBC (TaT1) patients' risk for relapse (DFS) and progression to invasive tumors (PFS) following TURBT according to tumor *CDKN2A* CNA status.**

|                          | <i>Univariate analysis</i>               |                           |                            |                                         |                                      |                             |                           |                            |                                         |                                      |
|--------------------------|------------------------------------------|---------------------------|----------------------------|-----------------------------------------|--------------------------------------|-----------------------------|---------------------------|----------------------------|-----------------------------------------|--------------------------------------|
|                          | Progression-free survival (PFS)          |                           |                            |                                         |                                      | Disease-free survival (DFS) |                           |                            |                                         |                                      |
| <b>Covariant</b>         | <b>HR<sup>a</sup></b>                    | <b>95% CI<sup>b</sup></b> | <b>p-value<sup>c</sup></b> | <b>Bootstrap BCa 95% CI<sup>d</sup></b> | <b>Bootstrap p-value<sup>c</sup></b> | <b>HR<sup>a</sup></b>       | <b>95% CI<sup>b</sup></b> | <b>p-value<sup>c</sup></b> | <b>Bootstrap BCa 95% CI<sup>d</sup></b> | <b>Bootstrap p-value<sup>c</sup></b> |
| <b><i>CDKN2A</i> CNA</b> |                                          |                           |                            |                                         |                                      |                             |                           |                            |                                         |                                      |
| Loss                     | 1.00                                     |                           |                            |                                         |                                      | 1.00                        |                           |                            |                                         |                                      |
| Diploid/gain             | 2.834                                    | 1.068 – 7.523             | 0.037                      | 1.242 – 12.516                          | 0.018                                | 2.168                       | 1.129 – 4.163             | 0.020                      | 1.229 – 4.610                           | 0.010                                |
| <b>Tumor Stage</b>       |                                          |                           |                            |                                         |                                      |                             |                           |                            |                                         |                                      |
| Ta                       | 1.00                                     |                           |                            |                                         |                                      | 1.00                        |                           |                            |                                         |                                      |
| T1                       | 1.685                                    | 0.773 – 3.669             | 0.189                      | 0.732 – 3.971                           | 0.168                                | 1.371                       | 0.783 – 2.402             | 0.270                      | 0.795 – 2.373                           | 0.267                                |
| <b>Tumor Grade</b>       |                                          |                           |                            |                                         |                                      |                             |                           |                            |                                         |                                      |
| Low                      | 1.00                                     |                           |                            |                                         |                                      | 1.00                        |                           |                            |                                         |                                      |
| High                     | 2.244                                    | 1.037 – 4.853             | 0.040                      | 1.026 – 5.202                           | 0.033                                | 1.493                       | 0.848 – 2.632             | 0.165                      | 0.850 – 2.613                           | 0.140                                |
| <b>Age (continuous)</b>  | 1.013                                    | 0.973 – 1.054             | 0.531                      | 0.977 – 1.054                           | 0.493                                | 0.997                       | 0.969 – 1.026             | 0.842                      | 0.972 – 1.026                           | 0.830                                |
| <b>Gender</b>            |                                          |                           |                            |                                         |                                      |                             |                           |                            |                                         |                                      |
| Male                     | 1.00                                     |                           |                            |                                         |                                      | 1.00                        |                           |                            |                                         |                                      |
| Female                   | 1.712                                    | 0.587 – 4.996             | 0.325                      | 0.314 – 4.522                           | 0.335                                | 1.420                       | 0.636 – 3.170             | 0.392                      | 0.535 – 3.208                           | 0.390                                |
|                          | <i>Multivariate analysis<sup>e</sup></i> |                           |                            |                                         |                                      |                             |                           |                            |                                         |                                      |
| <b>Covariant</b>         | <b>HR<sup>a</sup></b>                    | <b>95% CI<sup>b</sup></b> | <b>p-value<sup>c</sup></b> | <b>Bootstrap BCa 95% CI<sup>d</sup></b> | <b>Bootstrap p-value<sup>c</sup></b> | <b>HR<sup>a</sup></b>       | <b>95% CI<sup>b</sup></b> | <b>p-value<sup>c</sup></b> | <b>Bootstrap BCa 95% CI<sup>d</sup></b> | <b>Bootstrap p-value<sup>c</sup></b> |
| <b><i>CDKN2A</i> CNA</b> |                                          |                           |                            |                                         |                                      |                             |                           |                            |                                         |                                      |
| Loss                     | 1                                        |                           |                            |                                         |                                      | 1                           |                           |                            |                                         |                                      |
| Diploid/gain             | 3.069                                    | 1.119 – 8.416             | 0.029                      | 1.256 – 12.636                          | 0.017                                | 2.320                       | 1.155 – 4.657             | 0.018                      | 1.229 – 5.844                           | 0.013                                |
| <b>Tumor Stage</b>       |                                          |                           |                            |                                         |                                      |                             |                           |                            |                                         |                                      |
| Ta                       | 1                                        |                           |                            |                                         |                                      | 1                           |                           |                            |                                         |                                      |
| T1                       | 0.678                                    | 0.199 – 2.313             | 0.535                      | 0.177 – 2.155                           | 0.512                                | 1.038                       | 0.438 – 2.461             | 0.933                      | 0.365 – 2.838                           | 0.945                                |
| <b>Tumor Grade</b>       |                                          |                           |                            |                                         |                                      |                             |                           |                            |                                         |                                      |
| Low                      | 1                                        |                           |                            |                                         |                                      | 1                           |                           |                            |                                         |                                      |
| High                     | 3.526                                    | 1.014 – 12.266            | 0.048                      | 1.235 – 16.680                          | 0.032                                | 1.405                       | 0.582 – 3.390             | 0.450                      | 0.478 – 4.634                           | 0.517                                |
| <b>Age (continuous)</b>  | 1.023                                    | 0.979 – 1.070             | 0.311                      | 0.980 – 1.083                           | 0.308                                | 1.000                       | 0.970 – 1.031             | 0.992                      | 0.971 – 1.031                           | 0.990                                |
| <b>Gender</b>            |                                          |                           |                            |                                         |                                      |                             |                           |                            |                                         |                                      |
| Male                     | 1                                        |                           |                            |                                         |                                      | 1                           |                           |                            |                                         |                                      |
| Female                   | 1.200                                    | 0.347 – 4.154             | 0.774                      | 0.000 – 4.301                           | 0.764                                | 1.001                       | 0.416 – 2.408             | 0.998                      | 0.316 – 2.454                           | 0.995                                |

<sup>a</sup> Hazard Ratio, <sup>b</sup> 95% confidence interval of the estimated HR, <sup>c</sup> calculated by test for trend. Bootstrap *p*-value is based on 1000 bootstrap samples, <sup>d</sup> Bootstrap bias-corrected and accelerated 95% confidence interval of the estimated HR based on 1000 bootstrap samples, <sup>e</sup> Multivariate analysis adjusted for *CDKN2A* CNA status, tumors' stage, tumors' grade, patients' age and gender

**Table S2. Cox regression analysis for the prediction of MIBC (T2-T4) patients' risk for relapse (DFS) and overall survival (OS) following RC according to tumor *CDKN2A* CNA status.**

|                          | <i>Univariate analysis</i>  |                           |                                   |                                         |                                             |                       |                           |                                   |                                         |                                             |
|--------------------------|-----------------------------|---------------------------|-----------------------------------|-----------------------------------------|---------------------------------------------|-----------------------|---------------------------|-----------------------------------|-----------------------------------------|---------------------------------------------|
|                          | Disease-free survival (DFS) |                           |                                   |                                         |                                             | Overall survival (OS) |                           |                                   |                                         |                                             |
| <b>Covariant</b>         | <b>HR<sup>a</sup></b>       | <b>95% CI<sup>b</sup></b> | <b><i>p</i>-value<sup>c</sup></b> | <b>Bootstrap BCa 95% CI<sup>d</sup></b> | <b>Bootstrap <i>p</i>-value<sup>c</sup></b> | <b>HR<sup>a</sup></b> | <b>95% CI<sup>b</sup></b> | <b><i>p</i>-value<sup>c</sup></b> | <b>Bootstrap BCa 95% CI<sup>d</sup></b> | <b>Bootstrap <i>p</i>-value<sup>c</sup></b> |
| <b><i>CDKN2A</i> CNA</b> |                             |                           |                                   |                                         |                                             |                       |                           |                                   |                                         |                                             |
| Loss                     | 1.00                        |                           |                                   |                                         |                                             | 1.00                  |                           |                                   |                                         |                                             |
| Diploid/gain             | 0.957                       | 0.528 – 1.734             | 0.885                             | 0.536 – 1.651                           | 0.864                                       | 0.784                 | 0.419 – 1.469             | 0.448                             | 0.421 – 1.511                           | 0.451                                       |

<sup>a</sup> Hazard Ratio, <sup>b</sup> 95% confidence interval of the estimated HR, <sup>c</sup> calculated by test for trend. Bootstrap *p*-value is based on 1000 bootstrap samples,

<sup>d</sup> Bootstrap bias-corrected and accelerated 95% confidence interval of the estimated HR based on 1000 bootstrap samples



**Table S3. Cox regression analysis for the prediction of NMIBC (TaT1) patients' risk for relapse (DFS) and progression to invasive tumors (PFS) following TURBT according to cfDNA *CDKN2A* index.**

|                                  | <i>Univariate analysis</i>               |                           |                            |                                         |                                      |                             |                           |                            |                                         |                                      |
|----------------------------------|------------------------------------------|---------------------------|----------------------------|-----------------------------------------|--------------------------------------|-----------------------------|---------------------------|----------------------------|-----------------------------------------|--------------------------------------|
|                                  | Progression-free survival (PFS)          |                           |                            |                                         |                                      | Disease-free survival (DFS) |                           |                            |                                         |                                      |
| <b>Covariant</b>                 | <b>HR<sup>a</sup></b>                    | <b>95% CI<sup>b</sup></b> | <b>p-value<sup>c</sup></b> | <b>Bootstrap BCa 95% CI<sup>d</sup></b> | <b>Bootstrap p-value<sup>c</sup></b> | <b>HR<sup>a</sup></b>       | <b>95% CI<sup>b</sup></b> | <b>p-value<sup>c</sup></b> | <b>Bootstrap BCa 95% CI<sup>d</sup></b> | <b>Bootstrap p-value<sup>c</sup></b> |
| <b>cfDNA <i>CDKN2A</i> index</b> |                                          |                           |                            |                                         |                                      |                             |                           |                            |                                         |                                      |
| Low                              | 1.00                                     |                           |                            |                                         |                                      | 1.00                        |                           |                            |                                         |                                      |
| High                             | 2.954                                    | 1.210 – 7.210             | 0.017                      | 1.191 – 9.730                           | 0.013                                | 1.523                       | 0.821 – 2.825             | 0.182                      | 0.839 – 2.865                           | 0.159                                |
| <b>Tumor Stage</b>               |                                          |                           |                            |                                         |                                      |                             |                           |                            |                                         |                                      |
| Ta                               | 1.00                                     |                           |                            |                                         |                                      | 1.00                        |                           |                            |                                         |                                      |
| T1                               | 1.262                                    | 0.557 – 2.861             | 0.577                      | 0.531 – 3.274                           | 0.580                                | 1.051                       | 0.568 – 1.943             | 0.875                      | 0.546 – 1.914                           | 0.870                                |
| <b>Tumor Grade</b>               |                                          |                           |                            |                                         |                                      |                             |                           |                            |                                         |                                      |
| Low                              | 1.00                                     |                           |                            |                                         |                                      | 1.00                        |                           |                            |                                         |                                      |
| High                             | 1.908                                    | 0.841 – 4.327             | 0.122                      | 0.746 – 4.824                           | 0.117                                | 1.095                       | 0.584 – 2.053             | 0.776                      | 0.575 – 2.070                           | 0.750                                |
| <b>Age (continuous)</b>          | 1.017                                    | 0.976 – 1.059             | 0.418                      | 0.979 – 1.061                           | 0.347                                | 0.996                       | 0.967 – 1.026             | 0.803                      | 0.969 – 1.025                           | 0.772                                |
| <b>Gender</b>                    |                                          |                           |                            |                                         |                                      |                             |                           |                            |                                         |                                      |
| Male                             | 1.00                                     |                           |                            |                                         |                                      | 1.00                        |                           |                            |                                         |                                      |
| Female                           | 0.998                                    | 0.295 – 3.373             | 0.997                      | 0.041– 3.008                            | 0.997                                | 1.380                       | 0.609 – 3.128             | 0.440                      | 0.519 – 3.081                           | 0.424                                |
|                                  | <i>Multivariate analysis<sup>e</sup></i> |                           |                            |                                         |                                      |                             |                           |                            |                                         |                                      |
| <b>Covariant</b>                 | <b>HR<sup>a</sup></b>                    | <b>95% CI<sup>b</sup></b> | <b>p-value<sup>c</sup></b> | <b>Bootstrap BCa 95% CI<sup>d</sup></b> | <b>Bootstrap p-value<sup>c</sup></b> | <b>HR<sup>a</sup></b>       | <b>95% CI<sup>b</sup></b> | <b>p-value<sup>c</sup></b> | <b>Bootstrap BCa 95% CI<sup>d</sup></b> | <b>Bootstrap p-value<sup>c</sup></b> |
| <b>cfDNA <i>CDKN2A</i> index</b> |                                          |                           |                            |                                         |                                      |                             |                           |                            |                                         |                                      |
| Low                              | 1.00                                     |                           |                            |                                         |                                      | 1.00                        |                           |                            |                                         |                                      |
| High                             | 2.616                                    | 1.040 – 6.582             | 0.041                      | 1.069 – 9.062                           | 0.039                                | 1.480                       | 0.773 – 2.834             | 0.237                      | 0.776 – 2.986                           | 0.255                                |
| <b>Tumor Stage</b>               |                                          |                           |                            |                                         |                                      |                             |                           |                            |                                         |                                      |
| Ta                               | 1.00                                     |                           |                            |                                         |                                      | 1.00                        |                           |                            |                                         |                                      |
| T1                               | 0.680                                    | 0.207 – 2.235             | 0.525                      | 0.121– 2.151                            | 0.497                                | 1.039                       | 0.433 – 2.494             | 0.932                      | 0.302 – 3.298                           | 0.951                                |
| <b>Tumor Grade</b>               |                                          |                           |                            |                                         |                                      |                             |                           |                            |                                         |                                      |
| Low                              | 1.00                                     |                           |                            |                                         |                                      | 1.00                        |                           |                            |                                         |                                      |
| High                             | 2.632                                    | 0.799 – 8.665             | 0.111                      | 0.995 – 14.902                          | 0.082                                | 0.971                       | 0.400 – 2.357             | 0.947                      | 0.316 – 3.055                           | 0.954                                |
| <b>Age (continuous)</b>          | 1.021                                    | 0.976 – 1.068             | 0.371                      | 0.971 – 1.075                           | 0.354                                | 0.996                       | 0.967 – 1.026             | 0.797                      | 0.968 – 1.027                           | 0.782                                |
| <b>Gender</b>                    |                                          |                           |                            |                                         |                                      |                             |                           |                            |                                         |                                      |
| Male                             | 1.00                                     |                           |                            |                                         |                                      | 1.00                        |                           |                            |                                         |                                      |
| Female                           | 0.902                                    | 0.262– 3.109              | 0.870                      | 0.000 – 3.379                           | 0.830                                | 1.240                       | 0.541– 2.846              | 0.611                      | 0.407– 3.183                            | 0.599                                |

<sup>a</sup> Hazard Ratio, <sup>b</sup> 95% confidence interval of the estimated HR, <sup>c</sup> calculated by test for trend. Bootstrap *p*-value is based on 1000 bootstrap samples,

<sup>d</sup> Bootstrap bias-corrected and accelerated 95% confidence interval of the estimated HR based on 1000 bootstrap samples, <sup>e</sup> Multivariate analysis adjusted for cfDNA *CDKN2A* index, tumors' stage, tumors' grade, patients' age and gender

**Table S4. Cox regression analysis for the prediction of MIBC (T2-T4) patients' risk for relapse (DFS) and overall survival (OS) following RC according to cfDNA *CDKN2A* index.**

|                                  | <i>Univariate analysis</i>  |                     |                              |                                   |                                        |                       |                     |                              |                                   |                                        |
|----------------------------------|-----------------------------|---------------------|------------------------------|-----------------------------------|----------------------------------------|-----------------------|---------------------|------------------------------|-----------------------------------|----------------------------------------|
|                                  | Disease-free survival (DFS) |                     |                              |                                   |                                        | Overall survival (OS) |                     |                              |                                   |                                        |
| Covariant                        | HR <sup>a</sup>             | 95% CI <sup>b</sup> | <i>p</i> -value <sup>c</sup> | Bootstrap BCa 95% CI <sup>d</sup> | Bootstrap <i>p</i> -value <sup>c</sup> | HR <sup>a</sup>       | 95% CI <sup>b</sup> | <i>p</i> -value <sup>c</sup> | Bootstrap BCa 95% CI <sup>d</sup> | Bootstrap <i>p</i> -value <sup>c</sup> |
| <b>cfDNA <i>CDKN2A</i> index</b> |                             |                     |                              |                                   |                                        |                       |                     |                              |                                   |                                        |
| Low                              | 1.00                        |                     |                              |                                   |                                        | 1.00                  |                     |                              |                                   |                                        |
| High                             | 0.871                       | 0.509 – 1.489       | 0.613                        | 0.524 – 1.538                     | 0.612                                  | 0.854                 | 0.483 – 1.510       | 0.587                        | 0.489 – 1.528                     | 0.573                                  |

<sup>a</sup> Hazard Ratio, <sup>b</sup> 95% confidence interval of the estimated HR, <sup>c</sup> calculated by test for trend. Bootstrap *p*-value is based on 1000 bootstrap samples,

<sup>d</sup> Bootstrap bias-corrected and accelerated 95% confidence interval of the estimated HR based on 1000 bootstrap samples

**Table S5. Quality control and coverage metrics of DNA-seq PDX samples**

| <b>PDX samples</b> | <b>Total number of reads</b> | <b>Mean coverage depth (fold)</b> | <b>Coverage within target region (%)</b> | <b>MAPD<sup>a</sup></b> |
|--------------------|------------------------------|-----------------------------------|------------------------------------------|-------------------------|
| <b>1</b>           | 1883203                      | 2518.87                           | 99.72                                    | 0.39441                 |
| <b>2</b>           | 2060433                      | 2784.86                           | 99.93                                    | 0.42698                 |
| <b>3</b>           | 2044401                      | 2744.52                           | 98.15                                    | 0.47766                 |
| <b>4</b>           | 915206                       | 1289.31                           | 99.71                                    | 0.49905                 |
| <b>5</b>           | 1772378                      | 2389.49                           | 100.00                                   | 0.41090                 |
| <b>6</b>           | 322959                       | 468.93                            | 98.09                                    | 0.58995                 |
| <b>7</b>           | 1524642                      | 2056.76                           | 93.01                                    | 0.47898                 |
| <b>8</b>           | 1752553                      | 2361.70                           | 100.00                                   | 0.38851                 |
| <b>9</b>           | 1911000                      | 2568.20                           | 100.00                                   | 0.39664                 |
| <b>10</b>          | 2525261                      | 3332.68                           | 100.00                                   | 0.40899                 |
| <b>11</b>          | 663778                       | 896.01                            | 99.93                                    | 0.43910                 |
| <b>12</b>          | 3448397                      | 4558.24                           | 100.00                                   | 0.41968                 |
| <b>13</b>          | 1305438                      | 1810.33                           | 100.00                                   | 0.47777                 |
| <b>14</b>          | 2375262                      | 3120.10                           | 99.20                                    | 0.44610                 |
| <b>15</b>          | 2684208                      | 3549.67                           | 100.00                                   | 0.41497                 |

<sup>a</sup> MAPD: median absolute pairwise difference
